# Supplementary material for: HLA-DR7 and HLA-DQ2: Transgenic mouse strains tested as a model system for ximelagatran hepatotoxicity
Source: PubMed Central journal article supplement (PMC5608249; doi:10.1371/journal.pone.0184744), 2017-09-21

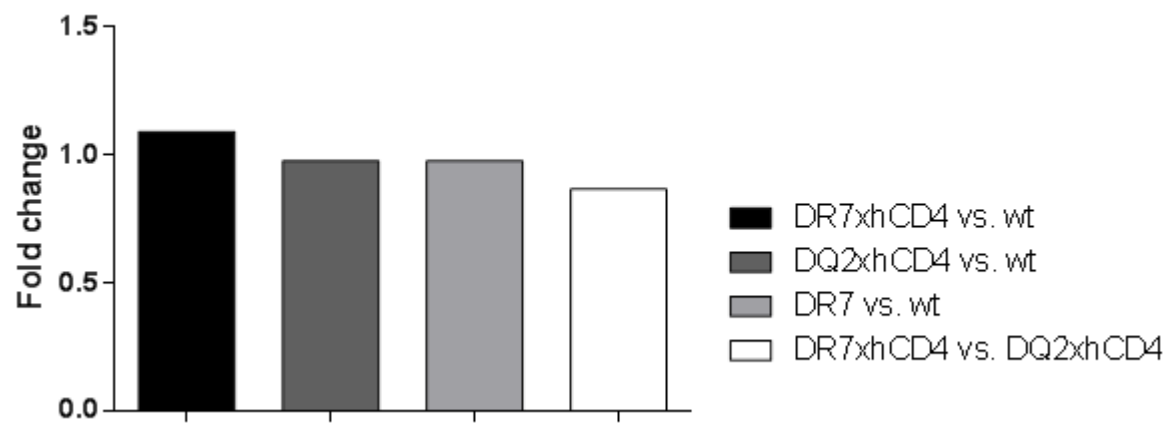

Supplement: pone.0184744.s003.pdf [file pone.0184744.s003.pdf]
